# Supplementary material
Source: publisher figshare collection journal article supplement (https://future-science-group.figshare.com/ndownloader/files/33079958)
Supplement: Supplementary file 1 [file 33079958]

Supplementary Table S3: Clinical and morphological features influencing OS and PFS in REM and REL subgroups.

| **Patient group** | **Outcome variable** | **Influencing variables** | **coef** | **SE** | **HR** | **Sig (p-value)** |
| --- | --- | --- | --- | --- | --- | --- |
| **REM patients** | OS | Presence of local recurrence | 1.31 | 0.40 | 3.72 | 0.001 |
| **REL patients** | OS | Presence of distant metastasis | 1.11 | 0.39 | 3.04 | 0.004 |
|  |  | Weak degree of sinus histiocytosis vs. none in N1 LNs | -1.04 | 0.47 | 0.35 | 0.03 |
|  |  | Strong degree of sinus histiocytosis vs. none in N1 LNs | -1.58 | 0.49 | 0.21 | 0.001 |
|  |  | Unknown degree of sinus histiocytosis vs. none in N1 LNs | -1.01 | 0.48 | 0.67 | 0.04 |
| **REM patients** | PFS | Stage II at surgery vs. stage I | -0.18 | -0.65 | 0.83 | 0.78 |
|  |  | Stage III at surgery vs. stage I | 2.23 | 0.87 | 9.28 | 0.01 |
|  |  | Between 10% and 50% TiLs vs. < 10% TiLs | -1.67 | 0.86 | 0.19 | 0.05 |
|  |  | >50% TiLs vs. < 10% TiLs | -1.67 | 0.88 | 0.19 | 0.06 |
|  |  | Unknown vs. < 10% TiLs | -12.91 | 502.50 | 0.00 | 0.98 |
| **REL patients** | PFS | Between 1 PY and 20 PY vs. never smoker | 1.31 | 0.89 | 3.71 | 0.14 |
|  |  | Between 21 PY and 40 PY vs. never smoker | -0.90 | 0.58 | 0.41 | 0.12 |
|  |  | Between 41 PY and 60 PY vs. never smoker | -1.20 | 0.66 | 0.30 | 0.07 |
|  |  | Between 61 PY and 80 PY vs. never smoker | -0.46 | 0.67 | 0.63 | 0.49 |
|  |  | Over 81 PY vs. never smoker | -0.82 | 0.65 | 0.44 | 0.21 |
|  |  | Unknown PY vs. never smoker | -0.85 | 0.53 | 0.43 | 0.11 |
